# Supplementary material for: Comparison of short-wavelength blue-light autofluorescence and conventional blue-light autofluorescence in geographic atrophy
Source: PubMed Central journal article supplement — Br J Ophthalmol. 2018 Jun 5;103(5):610–6. doi: 10.1136/bjophthalmol-2018-311849 (PMC6709768; doi:10.1136/bjophthalmol-2018-311849), 2018-06-05
Supplement: bjophthalmol-2018-311849supp003.pdf [file bjophthalmol-2018-311849supp003.pdf]

## Methodology - Supplemental Material

The color FAF image was first transformed in a 32-bit gray-scale image and then converted to a 8-bit gray-scale image. Since the color FAF has 8-bits of depth for each color channel, the 32-bit single channel grayscale image is computed as the average of the color channels in the original image, as follows:

(1)

$$\text{Grayscale image} = \mathbf{m} * \text{AVERAGE}(\mathbf{R}, \mathbf{G}, \mathbf{B}) = \mathbf{m} * (\mathbf{R}/3 + \mathbf{G}/3 + \mathbf{B}/3) = \\ \mathbf{m}/3 * (\mathbf{R} + \mathbf{G})$$

where  $\mathbf{m}$  is the rescaling factor used in the histogram stretching, and depends on the maximum value of  $\text{AVERAGE}(\mathbf{R}, \mathbf{G}, \mathbf{B})$ . Assumed “MAX” be the maximum value of  $\text{AVERAGE}(\mathbf{R}, \mathbf{G}, \mathbf{B})$ , then:

(2)

$$\mathbf{m} = 255/\text{MAX}$$

Since “MAX” is always  $\leq 255$ ,  $\mathbf{m}$  is always  $\geq 1$ . To simplify, we can define  $\mathbf{w1} = \mathbf{m}/3$ , and rewrite:

(3)

$$\text{Grayscale image} = \mathbf{w1} (\mathbf{R} + \mathbf{G})$$

Finally, in order to optimize the visualization of those regions where the REFC is absent or the AF is mainly due to the presence of GEFC, a “subtraction” function was performed, subtracting the “green channel” of the color FAF image from the obtained gray-scale FAF image, to yield the 450-RF image, as follows:

(4)

$$450\text{-RF} = \text{Gray-scale image} - G = \mathbf{w1} (R + G) - G = \mathbf{w1} R - (1 - \mathbf{w1}) G = \mathbf{w1} R - \mathbf{w2} G$$

where  $\mathbf{w2} = (1 - \mathbf{w1})$ .

To summarize, this image processing masks those regions which have one of these characteristics:

- $R=0$ .
- $G \geq (\mathbf{w1}/\mathbf{w2}) R$

Where  $\mathbf{w1}/\mathbf{w2}$  has a median value of 1.4 (IQR: 1.2-1.6) in our study cohort.

By using this approach rather than simply using the red channel of the color FAF image, all those regions where the intensity of the REFC is 0 and/or the AF is mainly due to the presence of GEFC are thus masked.
